# Supplementary material for: GenomeFISH: genome-based fluorescence in situ hybridization for strain-level visualization of microbial communities
Source: ISME J. 2025 Jul 7;19(1):wraf138. doi: 10.1093/ismejo/wraf138 (PMC12344553; doi:10.1093/ismejo/wraf138)
Supplement: Table_S1_wraf138 [file table_s1_wraf138.xlsx]

## Sheet: Isolate_genomes
Isolate genomes								Single cell identity and coverage
Isolate	Domain/Gram stain	GTDB classification	Completenes (%)	Contamination (%)	Coding density	Genome size (bp)	GC content	BCB6969	BCB6970	BCB6971	BCB6972	BCB6973	BCB6974	BCB6975	BCB6976	BCB6977	BBX3755	BCB6959	BCB6960	BCB6961	BCB6962	BCB6963	BCB6964	BCB6965	BCB6966	BCB6967	BCB6968
Escherichia coli CFT073	Bacteria/-	d__Bacteria;p__Proteobacteria;c__Gammaproteobacteria;o__Enterobacterales;f__Enterobacteriaceae;g__Escherichia;s__Escherichia coli	100	0.62	0.876	5119866	0.5	0.996484	0.967515	0.933563	0.953433	0.93466	0.959193	0.982881	0.217696	0.691979	0.76
Escherichia coli EDL933	Bacteria/-	d__Bacteria;p__Proteobacteria;c__Gammaproteobacteria;o__Enterobacterales;f__Enterobacteriaceae;g__Escherichia;s__Escherichia coli	100	0.04	0.874	5224101	0.5											0.592021	0.979379	0.969272	0.888636	0.99324	0.918318	0.974689	0.989562	0.996146	0.962884
Escherichia coli C43	Bacteria/-	d__Bacteria;p__Proteobacteria;c__Gammaproteobacteria;o__Enterobacterales;f__Enterobacteriaceae;g__Escherichia;s__Escherichia coli	100	0.18	0.88	4439914	0.51
Escherichia coli UQ950	Bacteria/-	d__Bacteria;p__Proteobacteria;c__Gammaproteobacteria;o__Enterobacterales;f__Enterobacteriaceae;g__Escherichia;s__Escherichia coli	100	0.13	0.881	4550754	0.51
Escherichia fergusonii	Bacteria/-	d__Bacteria;p__Proteobacteria;c__Gammaproteobacteria;o__Enterobacterales;f__Enterobacteriaceae;g__Escherichia;s__Escherichia fergusonii	100	1.37	0.89	4613940	0.5
Klebsiella aerogenes	Bacteria/-	d__Bacteria;p__Proteobacteria;c__Gammaproteobacteria;o__Enterobacterales;f__Enterobacteriaceae;g__Klebsiella;s__Klebsiella aerogenes	100	0.14	0.882	5250689	0.55
Pseudomonas aeruginosa	Bacteria/-	d__Bacteria;p__Proteobacteria;c__Gammaproteobacteria;o__Pseudomonadales;f__Pseudomonadaceae;g__Pseudomonas;s__Pseudomonas aeruginosa	100	0.05	0.896	6277818	0.67
Megamonas funiformis	Bacteria/-	d__Bacteria;p__Bacillota_C;c__Negativicutes;o__Selenomonadales;f__Selenomonadaceae;g__Megamonas;s__Megamonas funiformis	100	0.19	0.88	2322568	0.32
Agathobacter rectalis	Bacteria/+	d__Bacteria;p__Bacillota_A;c__Clostridia;o__Lachnospirales;f__Lachnospiraceae;g__Agathobacter;s__Agathobacter rectalis	99.97	0.35	0.876	3338047	0.41
Bacillus subtilis	Bacteria/+	d__Bacteria;p__Firmicutes;c__Bacilli;o__Bacillales;f__Bacillaceae;g__Bacillus;s__Bacillus subtilis	100	1.25	0.881	4963538	0.44
