# Supplementary material for: GenomeFISH: genome-based fluorescence in situ hybridization for strain-level visualization of microbial communities
Source: ISME J. 2025 Jul 7;19(1):wraf138. doi: 10.1093/ismejo/wraf138 (PMC12344553; doi:10.1093/ismejo/wraf138)
Supplement: Table_S3_wraf138 [file table_s3_wraf138.xlsx]

## Sheet: Bioreactor MAGs and SAGs
Population genome information							Single-cell identity and coverage
MAG ID	Relative abundance (%)	Completeness (%)	Contamination (%)	Genome size (bp)	GC content	GTDB-Tk taxonomy	BBV9897	BBV9898	BBV9899	BBV9900	BBV9901	BBV9903	BBV9904	BBV5732	BBV5733	BBV5735	BBV5736	BBV5739	BBV5740	BBV5741	BBV5742	BBV5743	BBV5744	BBV5745	BBV5746	BBV5747
vamb_bins.tsv.009	58.6365	99.81	3.49	3200740	0.43	d__Archaea;p__Halobacteriota;c__Methanosarcinia;o__Methanosarcinales;f__Methanoperedenaceae;g__Methanoperedens;s__Methanoperedens nitroreducens								0.477123	0.279569			0.710065	0.542842			0.76349			0.611104	0.800635
metabat_bins_sens.tsv.018_sub	3.85436	99.93	1.14	3530124	0.41	d__Bacteria;p__Planctomycetota;c__Brocadiae;o__Brocadiales;f__Brocadiaceae;g__Kuenenia;s__Kuenenia stuttgartiensis											0.122447						0.289334	0.486168
maxbin_bins.tsv.003	3.84094	100	7.13	6666804	0.68	d__Bacteria;p__Firmicutes_E;c__Symbiobacteriia;o__Symbiobacteriales;f__ZC4RG38;g__;s__
metabat2_refined_bins.tsv.020	3.34646	96.93	6.83	3597636	0.69	d__Bacteria;p__Planctomycetota;c__Phycisphaerae;o__Phycisphaerales;f__UBA1924;g__CAADGN01;s__CAADGN01 sp900696545
semibin_refined_bins.tsv.015	3.24475	100	1.34	5173313	0.57	d__Bacteria;p__Bacteroidota;c__SZUA-365;o__SZUA-365;f__SZUA-365;g__;s__
maxbin_bins.tsv.007	2.88364	99.41	0.31	4015920	0.35	d__Bacteria;p__Bacteroidota;c__Ignavibacteria;o__Ignavibacteriales;f__Melioribacteraceae;g__SURF-28;s__SURF-28 sp003599395										0.413089				0.825925	0.350611
concoct_bins.tsv.010_sub	2.32936	90.85	0.45	3368046	0.69	d__Bacteria;p__Deinococcota;c__Deinococci;o__Deinococcales;f__Trueperaceae;g__JAAYYF01;s__
semibin_refined_bins.tsv.019	1.54591	99.72	1.2	943662	0.45	d__Bacteria;p__Patescibacteria;c__Microgenomatia;o__UBA1400;f__Chazhemtobacteraceae;g__Chazhemtobacterium;s__Chazhemtobacterium aquaticus	0.847962	0.652319	0.620209	0.660625	0.520389	0.158767	0.827289
vamb_bins.tsv.003	0.925289	100	1.12	2390371	0.61	d__Bacteria;p__Firmicutes_E;c__SLMV01;o__;f__;g__;s__
rosella_refined_bins.tsv.003	0.612451	94.58	0.56	3624101	0.62	d__Bacteria;p__Verrucomicrobiota;c__Kiritimatiellae;o__SLAD01;f__SLAD01;g__;s__
concoct_bins.tsv.037	0.393024	94.15	3.28	3114083	0.6	d__Bacteria;p__Chloroflexota;c__Anaerolineae;o__Anaerolineales;f__EnvOPS12;g__UBA7227;s__UBA7227 sp002473085
metabat2_refined_bins.tsv.019	0.370587	66.88	1.46	2513138	0.72	d__Bacteria;p__Acidobacteriota;c__Thermoanaerobaculia;o__UBA5704;f__UBA5704;g__JAAYLR01;s__
concoct_bins.tsv.013_sub	0.312593	61.35	2.16	1138393	0.45	d__Bacteria;p__Patescibacteria;c__Microgenomatia;o__GWA2-44-7;f__UBA8517;g__;s__
concoct_bins.tsv.034_sub	0.297004	66.72	7.36	3130320	0.66	d__Bacteria;p__Proteobacteria;c__Alphaproteobacteria;o__Rhodospirillales;f__Magnetospirillaceae;g__;s__
concoct_bins.tsv.033	0.296268	57.71	0.72	583781	0.38	d__Bacteria;p__Patescibacteria;c__Microgenomatia;o__UBA1406;f__GWC2-37-13;g__GWC2-37-13;s__GWC2-37-13 sp002050095
