# Supplementary material for: GenomeFISH: genome-based fluorescence in situ hybridization for strain-level visualization of microbial communities
Source: ISME J. 2025 Jul 7;19(1):wraf138. doi: 10.1093/ismejo/wraf138 (PMC12344553; doi:10.1093/ismejo/wraf138)
Supplement: Table_S4_wraf138 [file table_s4_wraf138.xlsx]

## Sheet: Human faecal sample 1 MAGs
Population genome information							Single-cell identity and coverage
MAG ID	Relative abundance (%)	Completeness (%)	Contamination (%)	Genome size (bp)	GC content	GTDB-Tk taxonomy	BBV9000	BBV8995	BBV9003	BBV9039	BBV9053	BBV9017	BBV9035	BBW2820	BBV9054	BBW2784	BBW2802	BBW2815	BBV8998	BBV9011	BBV9063	BBV9033	BBV9034	BBV9041	BBV9037	BBW2807	BBV8994	BBV9057
metabat_bins_sens.tsv.061	6.3273	99.93	0.05	3250036	0.45	d__Bacteria;p__Bacteroidota;c__Bacteroidia;o__Bacteroidales;f__Bacteroidaceae;g__Prevotella;s__Prevotella copri_B	0.178292
maxbin_bins.tsv.003_sub	3.76811	84.49	0.24	2632452	0.42	d__Bacteria;p__Bacillota_A;c__Clostridia;o__Lachnospirales;f__Lachnospiraceae;g__Agathobacter;s__Agathobacter rectalis		0.113764	0.584725	0.828102	0.549671
rosella_refined_bins.tsv.023_sub	3.6058	97.81	2.14	3234923	0.46	d__Bacteria;p__Bacteroidota;c__Bacteroidia;o__Bacteroidales;f__Bacteroidaceae;g__Prevotella;s__Prevotella sp900313215													0.11193	0.137874
maxbin_bins.tsv.005	1.7826	99.37	1.3	2405503	0.34	d__Bacteria;p__Bacillota;c__Bacilli;o__Erysipelotrichales;f__Coprobacillaceae;g__Catenibacterium;s__Catenibacterium sp000437715
maxbin_bins.tsv.006	1.42553	89.98	1.93	2408706	0.58	d__Bacteria;p__Bacillota_A;c__Clostridia;o__Oscillospirales;f__Ruminococcaceae;g__Faecalibacterium;s__Faecalibacterium prausnitzii						0.451814	0.572189
metabat_bins_sens.tsv.062	1.086	98.58	0.19	2964457	0.48	d__Bacteria;p__Bacillota_A;c__Clostridia;o__Lachnospirales;f__Lachnospiraceae;g__Fusicatenibacter;s__Fusicatenibacter saccharivorans								0.51146
rosella_refined_bins.tsv.050_sub	0.957756	95.78	0.01	1958503	0.45	d__Bacteria;p__Bacillota_A;c__Clostridia;o__Oscillospirales;f__Acutalibacteraceae;g__Fimenecus;s__Fimenecus sp000432435															0.377385	0.794434
maxbin_bins.tsv.010	0.93431	100	0.44	2153756	0.56	d__Bacteria;p__Actinomycetota;c__Actinomycetia;o__Actinomycetales;f__Bifidobacteriaceae;g__Bifidobacterium;s__Bifidobacterium pseudocatenulatum
concoct_bins.tsv.048	0.841002	100	3.2	2493199	0.47	d__Bacteria;p__Bacillota_C;c__Negativicutes;o__Acidaminococcales;f__Acidaminococcaceae;g__Phascolarctobacterium_A;s__Phascolarctobacterium_A succinatutens									0.774347	0.209329
concoct_bins.tsv.063	0.829432	99.92	0.29	2931928	0.54	d__Bacteria;p__Bacteroidota;c__Bacteroidia;o__Bacteroidales;f__Bacteroidaceae;g__Prevotella;s__Prevotella sp003447235
concoct_bins.tsv.037	0.798157	81.66	0.88	1827924	0.6	d__Bacteria;p__Bacillota_A;c__Clostridia;o__Oscillospirales;f__Ruminococcaceae;g__Faecalibacterium;s__Faecalibacterium longum
maxbin_bins.tsv.016_sub	0.730036	99.38	2.6	4471008	0.42	d__Bacteria;p__Bacteroidota;c__Bacteroidia;o__Bacteroidales;f__Bacteroidaceae;g__Phocaeicola;s__Phocaeicola vulgatus											0.431412	0.588992
semibin_refined_bins.tsv.061	0.711831	99.82	0.23	2092135	0.6	d__Bacteria;p__Actinomycetota;c__Coriobacteriia;o__Coriobacteriales;f__Coriobacteriaceae;g__Collinsella;s__
semibin_refined_bins.tsv.013	0.669321	89.84	5.13	2582228	0.42	d__Bacteria;p__Bacillota_A;c__Clostridia;o__Lachnospirales;f__Lachnospiraceae;g__Dorea_A;s__Dorea_A longicatena
semibin_refined_bins.tsv.075_sub	0.659586	56.34	11.12	1898331	0.58	d__Bacteria;p__Bacillota_A;c__Clostridia;o__Oscillospirales;f__Ruminococcaceae;g__Faecalibacterium;s__Faecalibacterium prausnitzii_D
concoct_bins.tsv.112_sub	0.657411	93.79	0.23	2634856	0.53	d__Bacteria;p__Bacteroidota;c__Bacteroidia;o__Bacteroidales;f__Bacteroidaceae;g__Prevotella;s__Prevotella sp002251385																		0.179666
concoct_bins.tsv.049	0.64055	100	0.94	2377361	0.44	d__Bacteria;p__Bacillota_C;c__Negativicutes;o__Selenomonadales;f__Selenomonadaceae;g__Anaerovibrio;s__Anaerovibrio sp900548165
metabat_bins_sspec.tsv.017	0.572634	88.38	0.13	2110031	0.57	d__Bacteria;p__Bacillota_A;c__Clostridia;o__Oscillospirales;f__Ruminococcaceae;g__Gemmiger;s__Gemmiger qucibialis																					0.242895
semibin_refined_bins.tsv.028_sub	0.508049	81.42	1.93	2967401	0.44	d__Bacteria;p__Bacillota_A;c__Clostridia;o__Lachnospirales;f__Lachnospiraceae;g__Blautia_A;s__Blautia_A faecis
vamb_bins.tsv.030_sub	0.495648	92.22	1.05	1967555	0.34	d__Bacteria;p__Bacillota;c__Bacilli;o__Erysipelotrichales;f__Erysipelotrichaceae;g__Holdemanella;s__Holdemanella sp900556915
metabat_bins_sspec.tsv.009	0.394818	88.99	0.2	2315835	0.42	d__Bacteria;p__Bacillota_A;c__Clostridia;o__Lachnospirales;f__Lachnospiraceae;g__Mediterraneibacter;s__Mediterraneibacter torques																			0.372821	0.161873
metabat2_refined_bins.tsv.049	0.380871	96.57	0.73	2313461	0.56	d__Bacteria;p__Bacillota_A;c__Clostridia;o__Oscillospirales;f__Butyricicoccaceae;g__Agathobaculum;s__Agathobaculum butyriciproducens
semibin_refined_bins.tsv.026	0.378235	93.99	1.75	3061956	0.38	d__Bacteria;p__Bacillota_A;c__Clostridia;o__Lachnospirales;f__Lachnospiraceae;g__Anaerobutyricum;s__Anaerobutyricum hallii
vamb_bins.tsv.026	0.345768	84.5	1.79	2126112	0.37	d__Bacteria;p__Bacillota_A;c__Clostridia;o__Lachnospirales;f__Lachnospiraceae;g__Anaerostipes;s__Anaerostipes hadrus_A
metabat2_refined_bins.tsv.010_sub	0.328818	50.11	0.56	1280673	0.61	d__Bacteria;p__Bacillota_A;c__Clostridia;o__Oscillospirales;f__Ruminococcaceae;g__Faecalibacterium;s__Faecalibacterium sp900539945
semibin_refined_bins.tsv.092	0.326946	78.77	0.63	1850086	0.44	d__Bacteria;p__Bacillota_A;c__Clostridia;o__Lachnospirales;f__Lachnospiraceae;g__Mediterraneibacter;s__Mediterraneibacter lactaris
maxbin_bins.tsv.034_sub	0.320436	92.12	7.69	3573424	0.41	d__Bacteria;p__Bacillota_A;c__Clostridia;o__Lachnospirales;f__Lachnospiraceae;g__KLE1615;s__KLE1615 sp900066985
concoct_bins.tsv.036	0.317772	99.88	1.01	2395477	0.5	d__Bacteria;p__Bacteroidota;c__Bacteroidia;o__Bacteroidales;f__Muribaculaceae;g__Limisoma;s__Limisoma sp000437795
semibin_refined_bins.tsv.057_sub	0.284703	75.77	2.08	2248596	0.47	d__Bacteria;p__Bacillota_A;c__Clostridia;o__Lachnospirales;f__Lachnospiraceae;g__Oliverpabstia;s__Oliverpabstia faecicola
metabat_bins_sspec.tsv.029_sub	0.264517	88.71	2.37	1606570	0.62	d__Bacteria;p__Bacillota_A;c__Clostridia;o__Oscillospirales;f__Oscillospiraceae;g__ER4;s__ER4 sp900317525
concoct_bins.tsv.031_sub	0.256102	78.75	6	3004718	0.44	d__Bacteria;p__Bacillota_A;c__Clostridia;o__Lachnospirales;f__Lachnospiraceae;g__Agathobacter;s__Agathobacter faecis
semibin_refined_bins.tsv.045	0.23812	85.52	0.35	1795559	0.54	d__Bacteria;p__Bacillota_A;c__Clostridia;o__Oscillospirales;f__Acutalibacteraceae;g__UBA1417;s__UBA1417 sp003531055																						0.466779
concoct_bins.tsv.047	0.235443	86.55	1.99	2192130	0.5	d__Bacteria;p__Bacillota_A;c__Clostridia;o__Lachnospirales;f__Lachnospiraceae;g__Clostridium_Q;s__Clostridium_Q fessum
semibin_refined_bins.tsv.043	0.229034	86.16	1.15	3385088	0.46	d__Bacteria;p__Bacteroidota;c__Bacteroidia;o__Bacteroidales;f__Tannerellaceae;g__Parabacteroides;s__Parabacteroides merdae
maxbin_bins.tsv.048	0.228958	75.47	1.47	3556252	0.46	d__Bacteria;p__Bacteroidota;c__Bacteroidia;o__Bacteroidales;f__Tannerellaceae;g__Parabacteroides;s__Parabacteroides distasonis
maxbin_bins.tsv.047	0.209273	90.75	3.81	2273024	0.43	d__Bacteria;p__Bacillota_A;c__Clostridia;o__Oscillospirales;f__Ruminococcaceae;g__Ruminococcus_D;s__Ruminococcus_D bicirculans
concoct_bins.tsv.101_sub	0.206463	52.69	0.36	1592830	0.59	d__Bacteria;p__Bacillota_A;c__Clostridia;o__Oscillospirales;f__Ruminococcaceae;g__Gemmiger;s__Gemmiger sp900540595
concoct_bins.tsv.060	0.197815	69.63	3.96	2330118	0.48	d__Bacteria;p__Bacillota_A;c__Clostridia;o__Lachnospirales;f__Lachnospiraceae;g__Acetatifactor;s__Acetatifactor sp900066565																	0.263087
metabat_bins_sspec.tsv.025_sub	0.179774	59.42	1.54	1719153	0.44	d__Bacteria;p__Bacillota_A;c__Clostridia;o__Lachnospirales;f__Lachnospiraceae;g__Coprococcus_A;s__Coprococcus_A catus_A
concoct_bins.tsv.108_sub	0.167408	64.22	1.26	1572238	0.5	d__Bacteria;p__Bacillota_C;c__Negativicutes;o__Veillonellales;f__Megasphaeraceae;g__Caecibacter;s__Caecibacter sp003467125
concoct_bins.tsv.005	0.157255	61.75	3.57	1760688	0.59	d__Bacteria;p__Desulfobacterota;c__Desulfovibrionia;o__Desulfovibrionales;f__Desulfovibrionaceae;g__Desulfovibrio;s__Desulfovibrio sp900319575

## Sheet: Human faecal sample 2 MAGs
Population genome information							Single-cell identity and coverage
MAG ID	Relative abundance (%)	Completeness (%)	Contamination (%)	Genome size (bp)	GC content	GTDB-Tk taxonomy	BBW2793
semibin_refined_bins.tsv.014	9.58437	99.98	0.38	3165000	0.41	d__Bacteria;p__Bacillota_A;c__Clostridia;o__Lachnospirales;f__Lachnospiraceae;g__Agathobacter;s__Agathobacter rectalis	0.52
metabat_sens_bins.tsv.038	5.96565	99.64	0.03	3056983	0.48	d__Bacteria;p__Bacillota_A;c__Clostridia;o__Lachnospirales;f__Lachnospiraceae;g__Fusicatenibacter;s__Fusicatenibacter saccharivorans
rosella_refined_bins.tsv.062	2.69528	99.98	0.7	2153429	0.41	d__Bacteria;p__Bacillota_A;c__Clostridia;o__Oscillospirales;f__Acutalibacteraceae;g__Ruminococcus_E;s__Ruminococcus_E bromii_B
semibin_refined_bins.tsv.010	2.53556	87.7	3.39	3150308	0.42	d__Bacteria;p__Bacillota_A;c__Clostridia;o__Lachnospirales;f__Lachnospiraceae;g__Blautia_A;s__Blautia_A wexlerae
metabat2_refined_bins.tsv.005	1.7943	99.85	0.99	3720993	0.43	d__Bacteria;p__Bacillota_A;c__Clostridia;o__Lachnospirales;f__Lachnospiraceae;g__Roseburia;s__Roseburia intestinalis
metabat_sspec_bins.tsv.041	1.66278	99.55	0.09	2811356	0.54	d__Bacteria;p__Bacteroidota;c__Bacteroidia;o__Bacteroidales;f__Bacteroidaceae;g__Prevotella;s__Prevotella sp003447235
metabat_sens_bins.tsv.006	1.61303	99.6	1.09	2174469	0.34	d__Bacteria;p__Bacillota_I;c__Bacilli_A;o__Erysipelotrichales;f__Coprobacillaceae;g__Catenibacterium;s__Catenibacterium faecis
metabat2_refined_bins.tsv.013_sub	1.5594	82.88	0.03	2518736	0.42	d__Bacteria;p__Bacillota_A;c__Clostridia;o__Lachnospirales;f__Lachnospiraceae;g__Blautia_A;s__Blautia_A obeum
rosella_refined_bins.tsv.072_sub	1.18423	62.38	8.37	2529271	0.45	d__Bacteria;p__Bacteroidota;c__Bacteroidia;o__Bacteroidales;f__Bacteroidaceae;g__Bacteroides;s__Bacteroides eggerthii
semibin_refined_bins.tsv.021_sub	1.0651	82.54	1.7	2450066	0.45	d__Bacteria;p__Bacillota_A;c__Clostridia;o__Lachnospirales;f__Lachnospiraceae;g__Blautia_A;s__Blautia_A fusiformis
semibin_refined_bins.tsv.003	0.897029	95.97	0.04	2301003	0.59	d__Bacteria;p__Bacillota_A;c__Clostridia;o__Oscillospirales;f__Ruminococcaceae;g__Faecalibacterium;s__Faecalibacterium longum
metabat_sspec_bins.tsv.003	0.690706	99.67	1.76	2638646	0.37	d__Bacteria;p__Bacillota_A;c__Clostridia;o__Lachnospirales;f__Lachnospiraceae;g__Anaerostipes;s__Anaerostipes hadrus
metabat2_refined_bins.tsv.001	0.656003	89.45	0.1	3411857	0.42	d__Bacteria;p__Bacteroidota;c__Bacteroidia;o__Bacteroidales;f__Bacteroidaceae;g__Phocaeicola;s__Phocaeicola massiliensis
metabat_sens_bins.tsv.013	0.639205	99.66	2.84	2032455	0.6	d__Bacteria;p__Actinomycetota;c__Coriobacteriia;o__Coriobacteriales;f__Coriobacteriaceae;g__Collinsella;s__
semibin_refined_bins.tsv.016	0.49788	96.36	2.56	2224156	0.34	d__Bacteria;p__Bacillota_I;c__Bacilli_A;o__Erysipelotrichales;f__Erysipelotrichaceae;g__Holdemanella;s__Holdemanella sp900556915
semibin_refined_bins.tsv.012	0.437907	93.75	0.21	2655776	0.53	d__Bacteria;p__Bacteroidota;c__Bacteroidia;o__Bacteroidales;f__Bacteroidaceae;g__Prevotella;s__Prevotella sp002251385
semibin_refined_bins.tsv.006	0.430942	99.6	1.88	2304607	0.47	d__Bacteria;p__Bacillota_C;c__Negativicutes;o__Acidaminococcales;f__Acidaminococcaceae;g__Phascolarctobacterium_A;s__Phascolarctobacterium_A succinatutens_B
semibin_refined_bins.tsv.037	0.424175	99.76	0.49	2105708	0.56	d__Bacteria;p__Actinomycetota;c__Actinomycetes;o__Actinomycetales;f__Bifidobacteriaceae;g__Bifidobacterium;s__Bifidobacterium pseudocatenulatum
semibin_refined_bins.tsv.019	0.407661	92.54	2.02	2043523	0.54	d__Bacteria;p__Bacillota_A;c__Clostridia;o__Oscillospirales;f__Acutalibacteraceae;g__Hominenteromicrobium;s__Hominenteromicrobium mulieris
semibin_refined_bins.tsv.031	0.378941	69.58	1.44	2221958	0.44	d__Bacteria;p__Bacillota_A;c__Clostridia;o__Lachnospirales;f__Lachnospiraceae;g__Blautia_A;s__Blautia_A faecis
semibin_refined_bins.tsv.017	0.377991	99.1	0.72	2113640	0.55	d__Bacteria;p__Bacteroidota;c__Bacteroidia;o__Bacteroidales;f__Rikenellaceae;g__Alistipes;s__Alistipes putredinis
metabat_sens_bins.tsv.012	0.354127	83.23	0.43	2037956	0.42	d__Bacteria;p__Bacillota_A;c__Clostridia;o__Lachnospirales;f__Lachnospiraceae;g__Mediterraneibacter;s__Mediterraneibacter torques
semibin_refined_bins.tsv.015	0.338459	82.66	2.85	2657678	0.38	d__Bacteria;p__Bacillota_A;c__Clostridia;o__Lachnospirales;f__Lachnospiraceae;g__Anaerobutyricum;s__Anaerobutyricum hallii
metabat_sspec_bins.tsv.001_sub	0.336792	56.88	3.07	2683611	0.48	d__Bacteria;p__Bacteroidota;c__Bacteroidia;o__Bacteroidales;f__Bacteroidaceae;g__Bacteroides;s__Bacteroides uniformis
semibin_refined_bins.tsv.030	0.314797	81.92	2.32	1890824	0.44	d__Bacteria;p__Bacillota_C;c__Negativicutes;o__Selenomonadales;f__Selenomonadaceae;g__Anaerovibrio;s__Anaerovibrio sp900548165
semibin_refined_bins.tsv.032	0.304586	55.52	0.25	1653196	0.43	d__Bacteria;p__Bacillota_A;c__Clostridia;o__Lachnospirales;f__Lachnospiraceae;g__Bariatricus;s__Bariatricus comes
semibin_refined_bins.tsv.026_sub	0.291712	77.68	0.42	2864046	0.49	d__Bacteria;p__Bacteroidota;c__Bacteroidia;o__Bacteroidales;f__Bacteroidaceae;g__Paraprevotella;s__Paraprevotella clara
metabat2_refined_bins.tsv.002_sub	0.278885	78.26	9.46	6584682	0.42	d__Bacteria;p__Bacteroidota;c__Bacteroidia;o__Bacteroidales;f__Bacteroidaceae;g__Bacteroides;s__Bacteroides ovatus
semibin_refined_bins.tsv.028	0.274158	80.66	0.37	2247815	0.38	d__Bacteria;p__Bacillota_A;c__Clostridia;o__UBA1381;f__UBA1381;g__Hominilimicola;s__Hominilimicola fabiformis
metabat2_refined_bins.tsv.003	0.232291	66.43	0.67	1420435	0.4	d__Bacteria;p__Bacillota;c__Bacilli;o__Lactobacillales;f__Streptococcaceae;g__Streptococcus;s__Streptococcus salivarius
